# Supplementary material
Source: ML conference proceedings conference paper supplement (https://proceedings.neurips.cc/paper_files/paper/2019/hash/926ffc0ca56636b9e73c565cf994ea5a-Abstract.html)
Supplement: Supplementary file [file 926ffc0ca56636b9e73c565cf994ea5a-Supplemental.zip]

---

# Data Parameters: A New Family of Parameters for Learning a Differentiable Curriculum

## Supplementary Material

---

Shreyas Saxena  
Apple  
shreyas\_saxena@apple.com

Oncel Tuzel  
Apple  
otuzel@apple.com

Dennis DeCoste  
Apple  
ddecoste@apple.com

### Results for CIFAR100 under different noise ratio

| Model                           | Additional Clean Data | Noise = 20%                        | Noise = 80%                      |
|---------------------------------|-----------------------|------------------------------------|----------------------------------|
| MentorNet DD [1]                | Yes                   | 73.0                               | 35.0                             |
| Baseline                        | No                    | 60.0                               | 8.00                             |
| Forgetting [1]                  | No                    | 61.0                               | 16.0                             |
| Self-paced [1]                  | No                    | 70.0                               | 13.0                             |
| Reed Soft [1]                   | No                    | 62.0                               | 8.0                              |
| MentorNet PD [1]                | No                    | 72.0                               | 14.0                             |
| DCL (ours)                      | No                    | <b>75.68 <math>\pm</math> 0.12</b> | <b>35.8 <math>\pm</math> 1.0</b> |
| Baseline on clean data (oracle) | No                    | 77.79 $\pm$ 0.42                   | 58.32 $\pm$ 0.53                 |

Table 1: Performance of our method on CIFAR100 under under 20% and 80% uniform label noise with WideResNet28-10 model. Test accuracy shown in percentage.

### References

- [1] Lu Jiang, Zhengyuan Zhou, Thomas Leung, Li-Jia Li, and Li Fei-Fei. Mentornet: Learning data-driven curriculum for very deep neural networks on corrupted labels. In *ICML*, 2018.
